# Supplementary material
Source: PubMed Central journal article supplement (PMC5845703)
Supplement: mic-163-1680-s001.pdf [file mic-163-1680-s001.pdf]

## SUPPLEMENTARY MATERIAL

### **The *Agrobacterium tumefaciens* CheY-Like Protein ClaR Regulates Biofilm Formation**

Nathan Feirer, DohHyun Kim, Jing Xu, Nico Fernandez,  
Christopher M. Waters, and Clay Fuqua

Running title: *Agrobacterium* CheY-type biofilm regulator

- 1) Supplementary Figures – S1-S7
- 2) Supplementary Figure Legends
- 3) Supplementary Tables – S1-S2
- 4) Supplementary References

S1

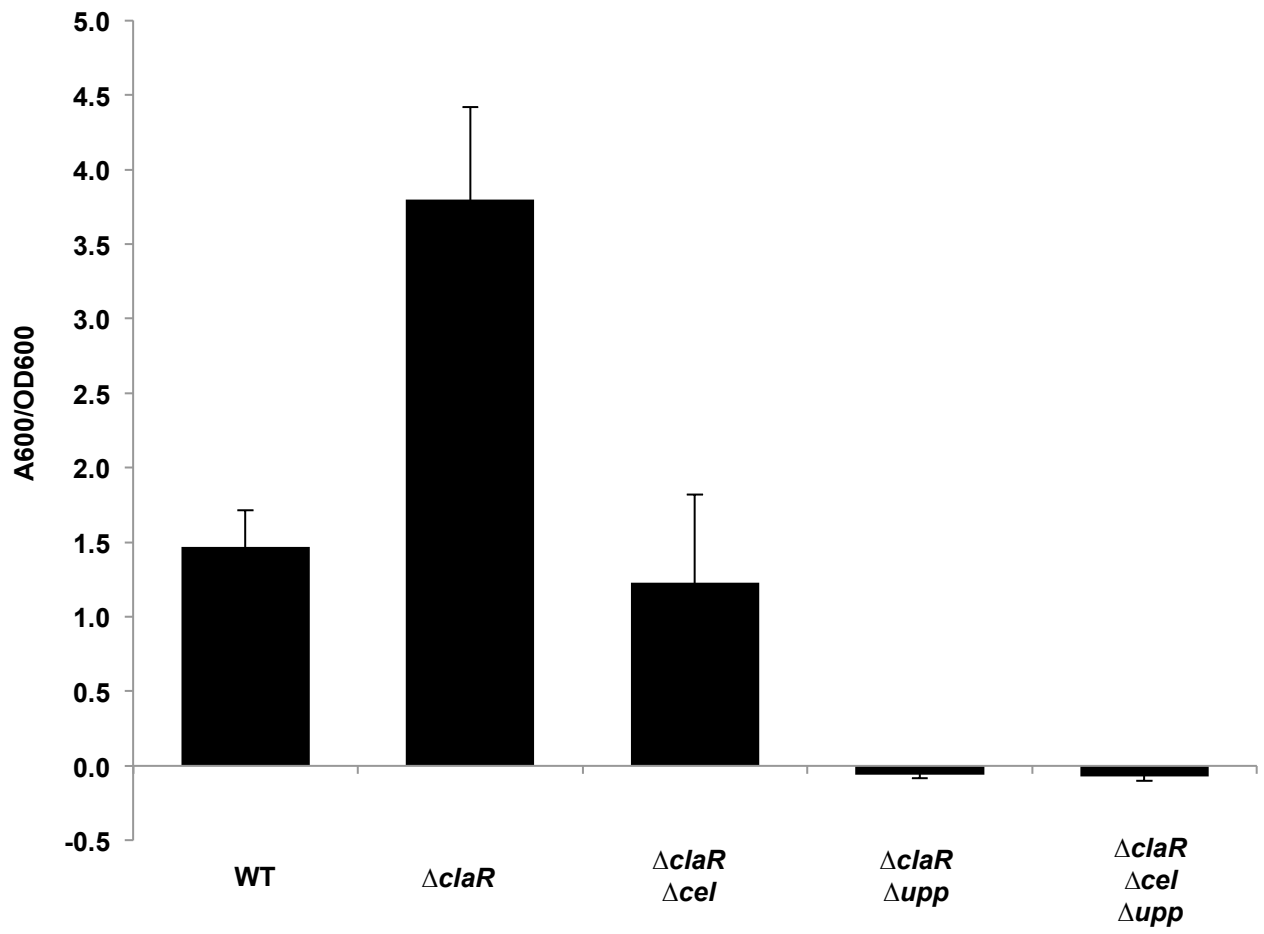

## S2a

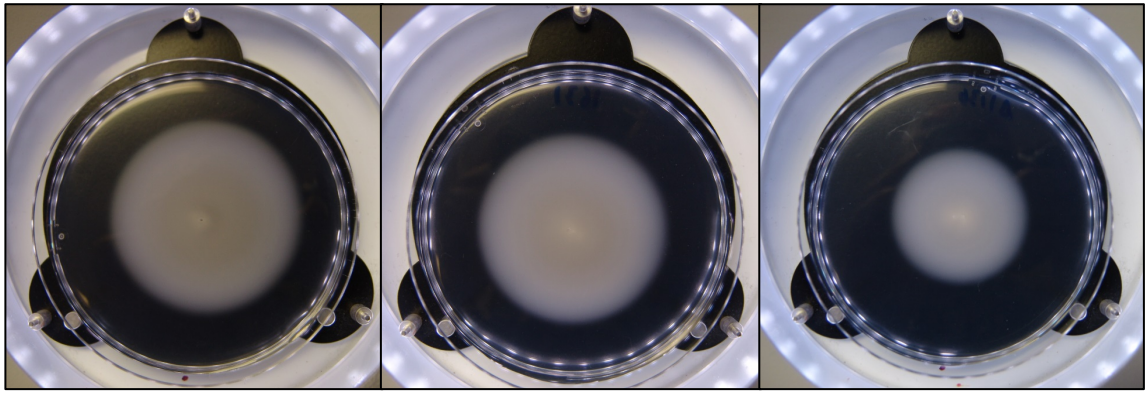

WT

$\Delta$ *claR*

$\Delta$ *pruA*

## S2b

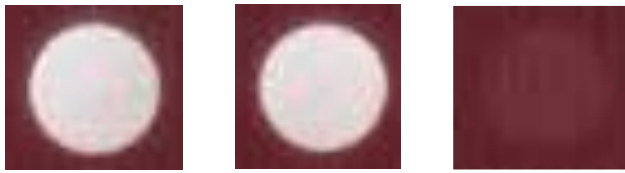

WT

$\Delta$ *claR*

$\Delta$ *pruA*

## S2c

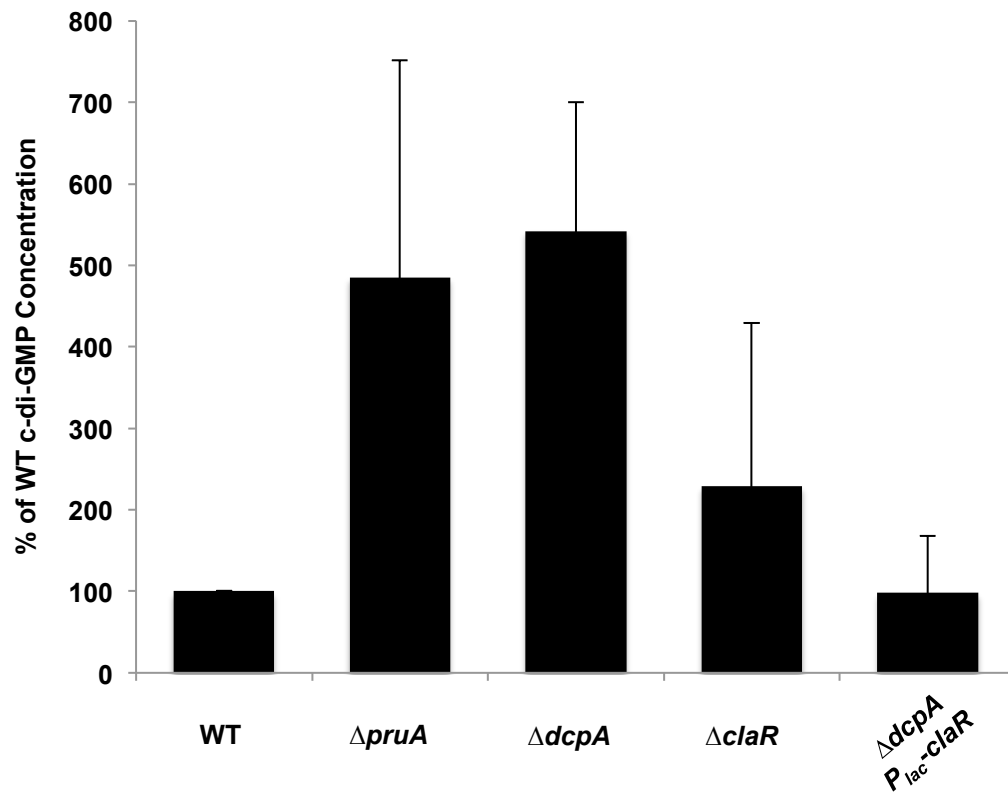

S3

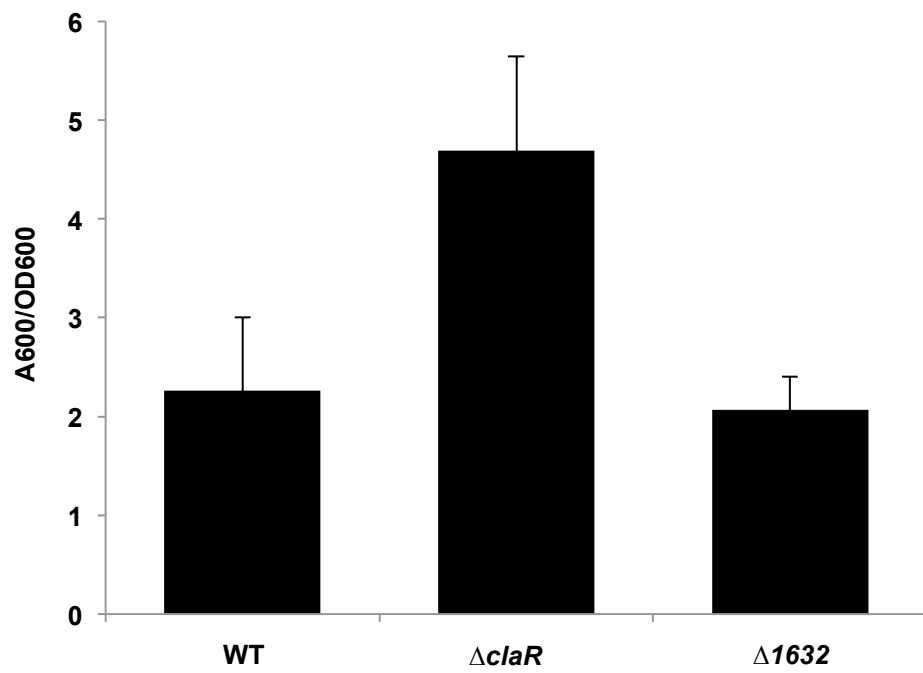



**S5a**

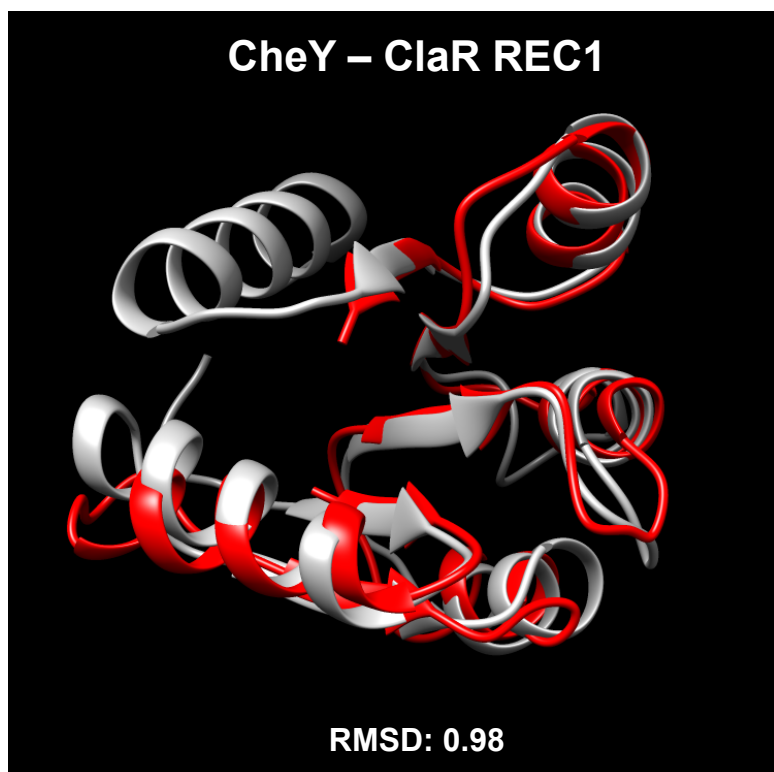

**S5b**

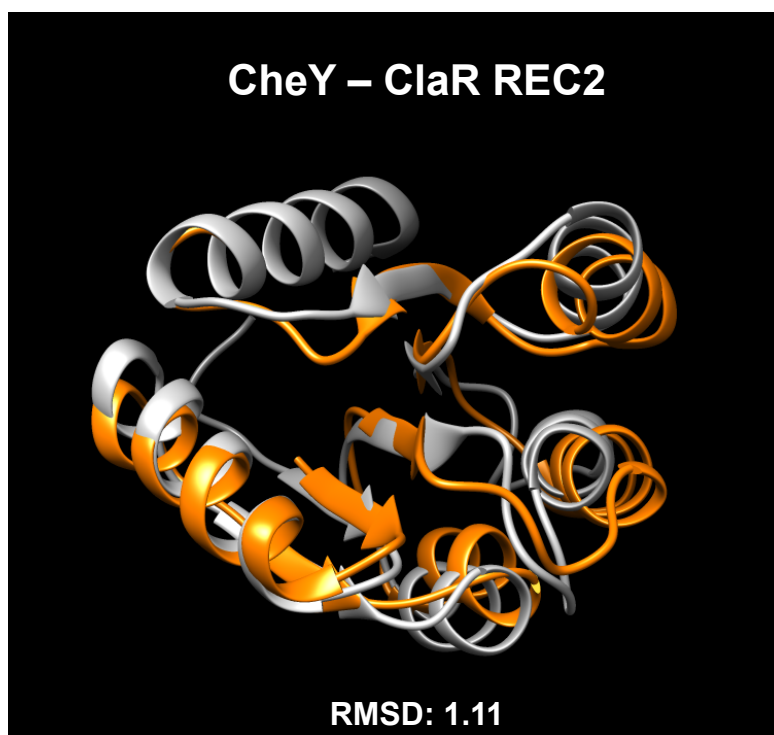

S6

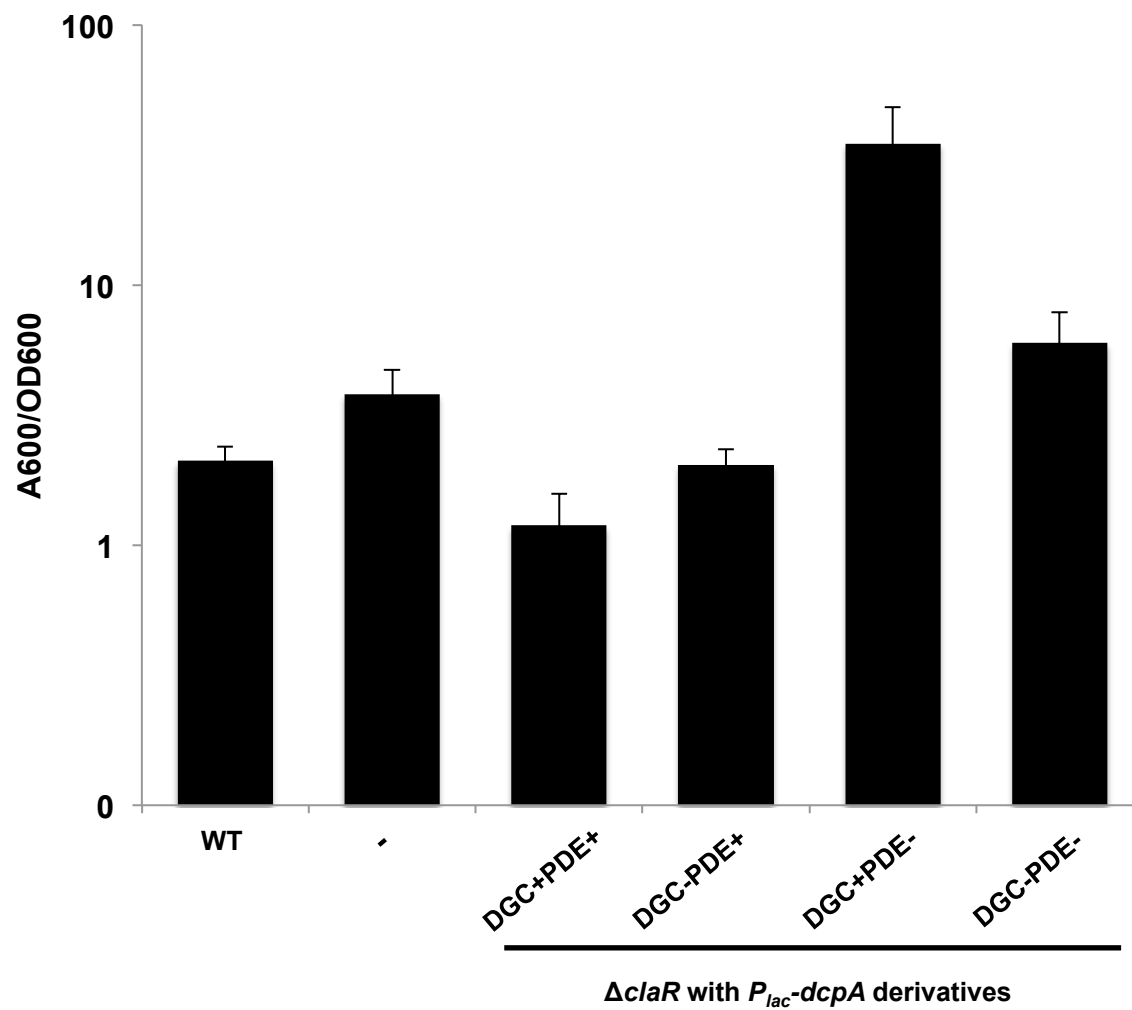

## S7a

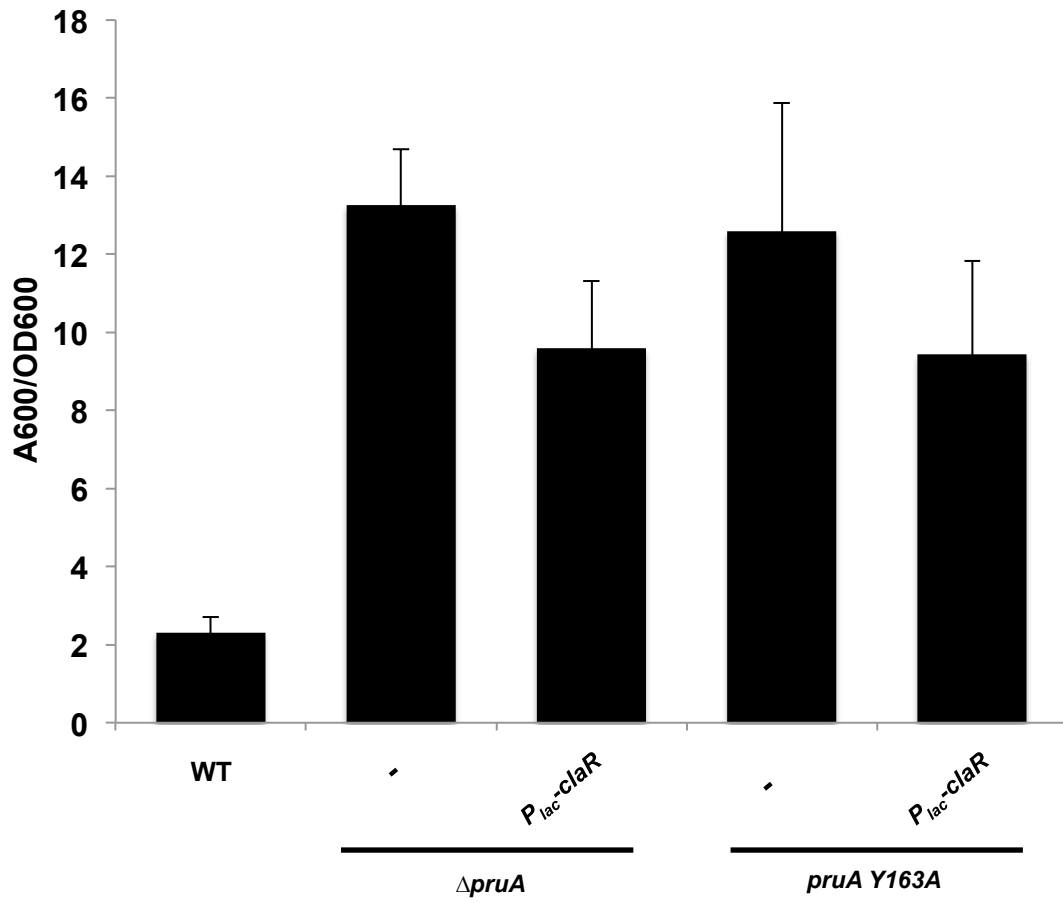

## S7b

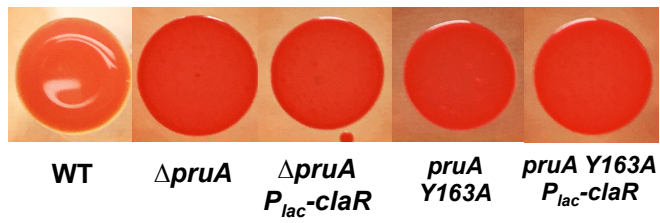



## Supplemental Figure Legends

**Figure S1. Polysaccharide dependence of ClaR biofilm phenotypes.** 48 hr PVC coverslip biofilms quantified as described in Fig. 2A.  $\Delta cel$  strains are unable to produce cellulose and  $\Delta upp$  strains are unable to produce the UPP. Values are result of two independent biological replicates consisting of three technical replicates each. Error bars: +/- 1 standard deviation.

**Figure S2. Additional ClaR phenotypes.** (A) *A. tumefaciens* soft agar motility assay. Indicated strains were grown to mid-exponential phase and spotted into ATGN plates containing 0.3% (w v<sup>-1</sup>) Bacto agar. Plates were dried and placed in room temperature Tupperware container alongside beaker of saturated potassium sulfate. Plates were incubated for 5 days, at which time pictures were taken. (B) Calcofluor staining phenotypes of *A. tumefaciens* colonies. Indicated strains were grown to mid-exponential phase, normalized to an OD<sub>600</sub> of 0.5 and spotted onto LB plates containing 20 µg/ml calcofluor white (fluorescent white) dye. Spots were dried and photographs taken under UV light exposure in a light cabinet after 48 hours of growth at 28°C. (C) Intracellular c-di-GMP concentrations of *A. tumefaciens* mutants. Indicated strains were grown to early stationary phase, normalized for OD followed by nucleotide extraction. Measurements of c-di-GMP with LC-MS-MS as described in *Materials and Methods*. As with previous experiments, the extended version of ClaR (*claR-Ext.*) was utilized for overexpression studies. Values are the result of two independent biological replicates consisting of three technical replicates each. Error bars: +/- 1 standard deviation.

**Figure S3. Atu1632 Doesn't Regulate *A. tumefaciens* biofilm formation.** 48 hr PVC coverslip biofilms quantified as described in Fig. 2A. Values are the result of three independent biological replicates consisting of three technical replicates each. Error bars: +/- 1 standard deviation.

**Figure S4. Alignment of ClaR Homologs.** Alignment of ClaR (Annotated and Extended) to closely related Rhizobial bi-directional best-hit homologs. *A. radiobacter* K84 ACM26930.1 (79% aa identity vs ClaR), *R. leguminosarum* WP\_012757872 (79% aa identity vs ClaR), and *A. vitis* WP\_015916382.1 (77% aa identity vs ClaR). Alignment performed with ClustalX software ([www.clustal.org](http://www.clustal.org)) using multiple alignment mode.

**Figure S5. Secondary structure alignment of predicted ClaR REC domains with experimentally determined CheY structure from *E. coli*.** Predicted REC domain Phyre tertiary structures described in Fig. 3 computationally aligned to published *E. coli* crystal structure (3CHY). Alignments performed and visualized using UCSF Chimera (<https://www.cgl.ucsf.edu/chimera/>) with Needleman-Wunsch alignment algorithm. Coloring as follows: (A) CheY: grey, ClaR REC1: red. (B) CheY: grey, ClaR REC2: orange. Root mean-square deviation (RMSD) values overlaid on alignment images.

**Figure S6. DcpA PDE activity can decrease biofilm formation of *claR* mutant.** 48 hr PVC coverslip biofilms quantified as described in Fig. 2a. Values are the result of three independent biological replicates consisting of three technical replicates each.

Error bars: +/- 1 SD. DcpA variants containing catalytic site mutations GGDEF->GGDAF (DGC-) and EAL->AAL (PDE-) were examined.

**Figure S7: ClaR does not regulate attachment in a PruA catalytic site mutant. (A)**

48 hr PVC coverslip biofilms quantified as described in Fig. 2A. Values are the result of three independent biological replicates consisting of three technical replicates each.

Error bars: +/- 1 standard deviation. Dash represents strain without plasmid inserted.

(B) Congo red colony phenotypes of indicated *A. tumefaciens* strains, as described by Fig. 5B.

**Table S1**  
**Strains and plasmids**

| Strain/plasmid               | Relevant features                                                                          | Reference        |
|------------------------------|--------------------------------------------------------------------------------------------|------------------|
| <b><i>E. coli</i></b>        |                                                                                            |                  |
| DH5 $\alpha$ / $\lambda$ pir | $\lambda$ pir ; cloning strain                                                             | (1)              |
| TOP10 F'                     | Cloning strain                                                                             | Invitrogen       |
| S17-1/ $\lambda$ pir         | $\lambda$ pir ; Tra <sup>+</sup> , cloning host                                            | (2)              |
| <b><i>A. tumefaciens</i></b> |                                                                                            |                  |
| C58                          | Nopaline type strain; pTiC58; pAtC58                                                       | (3)              |
| NF001                        | <i>pruA</i> Y163A allelic replacement                                                      | (4)              |
| NF003                        | $\Delta$ <i>pruR</i>                                                                       | (4)              |
| NF009                        | $\Delta$ Atu1632                                                                           | This study       |
| NF011                        | $\Delta$ <i>claR</i> $\Delta$ <i>cel</i>                                                   | This study       |
| NF012                        | $\Delta$ <i>claR</i> $\Delta$ <i>upp</i>                                                   | This study       |
| NF013                        | $\Delta$ <i>claR</i> $\Delta$ <i>cel</i> $\Delta$ <i>upp</i>                               | This study       |
| JX136                        | $\Delta$ <i>claR</i>                                                                       | This study       |
| JX137                        | $\Delta$ <i>pruA</i>                                                                       | (5)              |
| JX138                        | $\Delta$ <i>dcpA</i>                                                                       | (5)              |
| <b>Plasmids</b>              |                                                                                            |                  |
| pGEM-T easy                  | PCR cloning vector; Ap <sup>R</sup>                                                        | Promega          |
| pNPTS138                     | ColE1 suicide plasmid; <i>sacB</i> ; Km <sup>R</sup>                                       | Gift of M. Alley |
| pSRKGm                       | Broad host range <i>P</i> <sub>lac</sub> expression vector; <i>lacIQ</i> ; Gm <sup>R</sup> | (6)              |
| pNF030                       | pSRKGm carrying <i>P</i> <sub>lac</sub> - <i>dcpA</i> E308A; Gm <sup>R</sup>               | (4)              |
| pNF031                       | pSRKGm carrying <i>P</i> <sub>lac</sub> - <i>dcpA</i> E431A; Gm <sup>R</sup>               | (4)              |
| pNF032                       | pSRKGm carrying <i>P</i> <sub>lac</sub> - <i>dcpA</i> E308A E431A; Gm <sup>R</sup>         | (4)              |
| pNF054                       | pSRKGm carrying <i>P</i> <sub>lac</sub> - <i>claR</i> Ext.; Gm <sup>R</sup>                | This study       |
| pNF058                       | pSRKGm carrying <i>P</i> <sub>lac</sub> - <i>claR</i> Ext. D193A Allele; Gm <sup>R</sup>   | This study       |
| pNF059                       | pSRKGm carrying <i>P</i> <sub>lac</sub> - <i>claR</i> Ext. D193N Allele; Gm <sup>R</sup>   | This study       |
| pNF078                       | pNPTS138 carrying <i>Atu1632</i> SOE deletion fragment; Km <sup>R</sup>                    | This study       |
| pJX131                       | pNPTS138 carrying <i>claR</i> SOE deletion fragment; Km <sup>R</sup>                       | This study       |
| pJX148                       | pSRKGm carrying <i>P</i> <sub>lac</sub> - <i>claR</i> Annot.; Gm <sup>R</sup>              | This study       |
| pJW168                       | pSRKGm carrying <i>P</i> <sub>lac</sub> - <i>dcpA</i> ; Gm <sup>R</sup>                    | (5)              |

<sup>a</sup>All *A. tumefaciens* strains are C58 derivatives

**Table S2. Oligonucleotides**

| <b>Primer</b> | <b>Sequence</b>                                                  |
|---------------|------------------------------------------------------------------|
| D193A P1      | GTCTCGTCGTGACC <b>GCC</b> TATAATATGCCCCG                         |
| D193A P2      | CGGGCATATTATA <b>GGC</b> GGTCACGACGAGAC                          |
| D193N P1      | GTCTCGTCGTGACC <b>AAC</b> TATAATATGCCCCGATATT                    |
| D193N P2      | CAATATCGGGCATATTATA <b>GTT</b> GGTCACGACGAGA                     |
| De1631-P1     | (SpeI) <b>actagt</b> CGTTTGCATGAATTGCGTTCGCAG                    |
| De1631-P2     | <i>aagcttggtaccgaattc</i> GCCGGGTTTTCCCGTCAAAGCTGA               |
| De1631-P3     | <i>gaattcggtagc</i> caagcttCACATTGCTGTCTTCCGCCAG                 |
| De1631-P4     | (PstI) <b>ctgcag</b> AAGTCGATTGCACTTGCCATGCTC                    |
| 1632 Del P1   | (SpeI) <b>gaactagt</b> taaGTCGCCTCATGGAAGGTGCTG                  |
| 1632 Del P2   | <i>caggggtctgtaa</i> atgaagacaCGCGCAT<br>AAGATCATTCCCTC          |
| 1632 Del P3   | <i>gaggg</i> aatgatcttatg <b>cgcg</b> TGTCTTCATT<br>TACAGAACCCTG |
| 1632 Del P4   | (NheI) <b>ga</b> gctagcgttCGAATTGCGTTTCCACCTTGC                  |
| 1632 Del P5   | GCACATGATGGCGGTGATTGGTG                                          |
| 1632 Del P6   | CTTCTGTGCGGGA <b>ACTGGACG</b>                                    |
| 1631 new 5'   | (Nde1) gcg <b>catATG</b> AATTTCTGGGCATTAC                        |
| Com1631-P1    | (SpeI) <b>actagt</b> TCAGCTTTGACGGGAAAACCCGGC                    |
| M13-F         | CGCCAGGGTTTTCCAGTCACGAC                                          |
| M13-R         | TCACACAGGAAACAGCTATGAC                                           |

Upper case sequence anneals to target sequences; lower case are engineered into oligonucleotides but do not anneal with target sequences in genome

Italicized sequences are complementary among paired oligonucleotides

Engineered restriction endonuclease cleavage sites are indicated in parentheses and highlighted in yellow

Bases altered for site-specific mutagenesis highlighted in red

## References

1. **Chiang SL, Rubin EJ.** 2002. Construction of a mariner-based transposon for epitope-tagging and genomic targeting. *Gene* **296**:179-185.
2. **Kalogeraki VS, Winans SC.** 1997. Suicide plasmids containing promoterless reporter genes can simultaneously disrupt and create fusions to target genes of diverse bacteria. *Gene* **188**:69-75.
3. **Xu J, Platt TG, Fuqua C.** 2012. Regulatory linkages between flagella and surfactant during swarming behavior: lubricating the flagellar propeller? *J Bacteriol* **194**:1283-1286.
4. **Feirer N, Xu J, Allen KD, Koestler BJ, Bruger EL, Waters CM, White RH, Fuqua C.** 2015. A Pterin-Dependent Signaling Pathway Regulates a Dual-Function Diguanylate Cyclase-Phosphodiesterase Controlling Surface Attachment in *Agrobacterium tumefaciens*. *mBio* **6**.
5. **Xu J, Kim J, Koestler BJ, Choi JH, Waters CM, Fuqua C.** 2013. Genetic analysis of *Agrobacterium tumefaciens* unipolar polysaccharide production reveals complex integrated control of the motile-to-sessile switch. *Mol Microbiol*.
6. **Khan SR, Gaines J, Roop RM, 2nd, Farrand SK.** 2008. Broad-host-range expression vectors with tightly regulated promoters and their use to examine the influence of TraR and TraM expression on Ti plasmid quorum sensing. *Appl Environ Microbiol* **74**:5053-5062.
